# Supplementary material for: Tailoring transcranial alternating current stimulation based on endogenous event-related P3 to modulate premature responses: a feasibility study
Source: PeerJ journal article supplement (doi:10.7717/peerj.17144), 2024-04-03
Supplement: questionrio_blinding.pdf [file questionrio_blinding.pdf]

Iniciais do sujeito: \_\_\_\_\_ Protocolo # \_\_\_\_\_

Data: \_\_\_/\_\_\_/\_\_\_

Nome do(s) investigador(es): \_\_\_\_\_

Título do estudo (abreviado): \_\_\_\_\_

## **Validação do Blinding**

Por favor, indique se é o investigador, o avaliador ou o participante:

-Investigador (\_\_\_)

-Avaliador (\_\_\_)

-Participante (\_\_\_)

Por favor, indique o seu melhor palpite, sobre qual o grupo de estimulação em que foi inserido:

-Experimental (\_\_\_)

-Placebo (\_\_\_)

-Não sei (\_\_\_)

Quão confiante está de que o seu palpite está correto?

- Extremamente (\_\_\_)

-Consideravelmente (\_\_\_)

-Moderadamente (\_\_\_)

-Levemente (\_\_\_)

-De modo nenhum (\_\_\_)
