# Supplementary material for: Tailoring transcranial alternating current stimulation based on endogenous event-related P3 to modulate premature responses: a feasibility study
Source: PeerJ journal article supplement (doi:10.7717/peerj.17144), 2024-04-03
Supplement: questionrio_blinding_english.pdf [file questionrio_blinding_english.pdf]

Subject: \_\_\_\_\_ Protocol # \_\_\_\_\_

Date: \_\_\_/\_\_\_/\_\_\_

Researcher name: \_\_\_\_\_

Title of the study: \_\_\_\_\_

## **Blinding**

Please indicate whether you are the researcher, reviewer or participant:

-Researcher(  )

-Rater (  )

-Participant (  )

Please indicate your best guess as to which stimulation group you were placed in:

-Active (  )

-Sham (  )

-I don't know (  )

How confident are you that your guess is correct?

- Extremely (  )

- Considerably (  )

- Moderate (  )

- Slightly (  )

- Not at all (  )
